# Supplementary material
Source: ML conference proceedings conference paper supplement (https://openaccess.thecvf.com/content/CVPR2021/html/Zhou_Pose-Controllable_Talking_Face_CVPR_2021_paper.html)
Supplement: Supplementary file 1 [file Zhou_Pose-Controllable_Talking_Face_CVPR_2021_supplemental.zip]

Archive with 2 entries (2 files):
- 01845-supp.mp4
- Pose-Controllable_Talking_Face_Generation_by_Implicitly_Modularized_Audio-Visual_Representation_supp.pdf
